# Supplementary material for: Direct measurement of stool consistency by texture analyzer and calculation of reference value in Belgian general population
Source: PubMed Central journal article supplement (PMC7840686; doi:10.1038/s41598-021-81783-7), 2021-01-27
Supplement: 41598_2021_81783_MOESM1_ESM.pdf [file 41598_2021_81783_MOESM1_ESM.pdf]

**Supplementary Information for**

**Direct measurement of stool consistency by texture analyzer and calculation of reference value in Belgian general population**

Kazunori Matsuda<sup>1,2</sup>, Takuya Akiyama<sup>1,2</sup>, Satoshi Tsujibe<sup>1</sup>, Kaihei Oki<sup>1,2</sup>,  
Agata Gawad<sup>1</sup>, and Junji Fujimoto<sup>1,2</sup>

<sup>1</sup>Yakult Honsha European Research Center for Microbiology VOF, Technologiepark 94 bus 3, 9052 Ghent-Zwijnaarde, Belgium. <sup>2</sup>Yakult Central Institute, 5-11 Izumi, Kunitachi-shi, Tokyo, 186-8650 Japan. email: kazunori-matsuda@yakult.co.jp

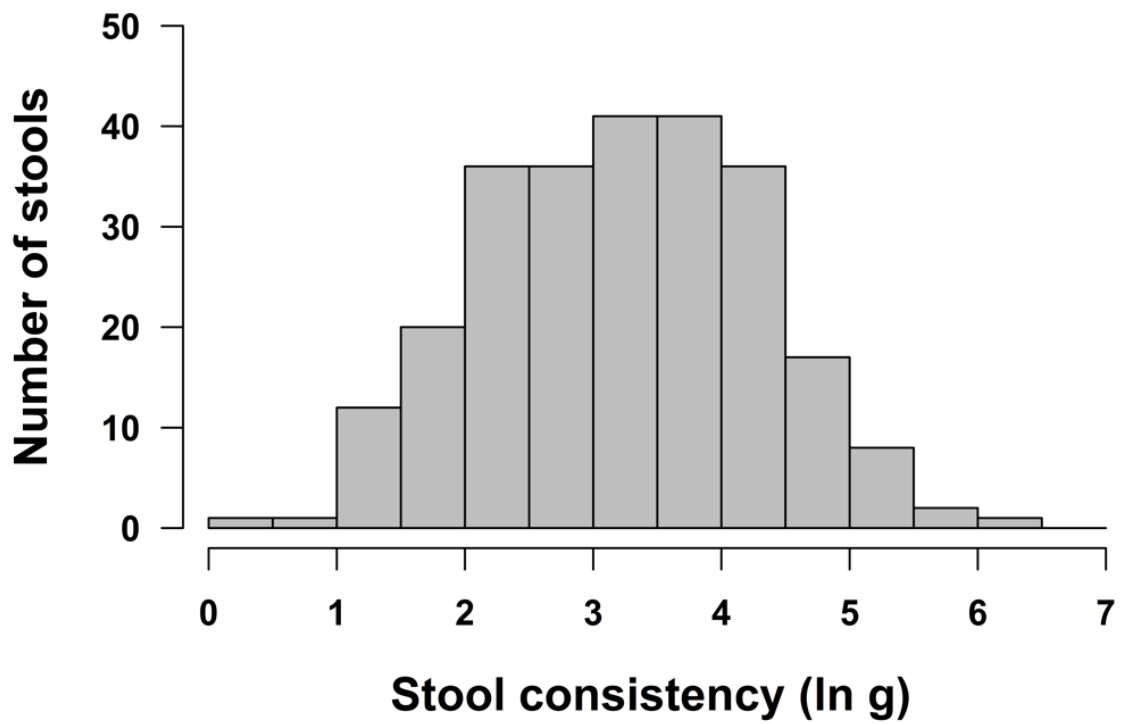

**Figure S1.** Distribution of consistency values of stool samples from healthy Belgian adults. Histogram of log-transformed stool consistency values (ln g/probe). Values of 252 stool samples collected from 40 subjects were measured by texture analyzer.

# THE BRISTOL STOOL FORM SCALE

|               |                                                                                     |                                                 |
|---------------|-------------------------------------------------------------------------------------|-------------------------------------------------|
| <i>Type 1</i> | 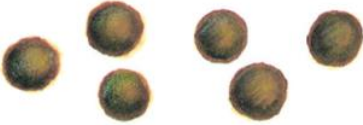   | Separate hard lumps, like nuts (hard to pass)   |
| <i>Type 2</i> |    | Sausage-shaped but lumpy                        |
| <i>Type 3</i> |    | Like a sausage but with cracks on its surface   |
| <i>Type 4</i> |  | Like a sausage or snake, smooth and soft        |
| <i>Type 5</i> |  | Soft blobs with clear-cut edges (passed easily) |
| <i>Type 6</i> |  | Fluffy pieces with ragged edges, a mushy stool  |
| <i>Type 7</i> |  | Watery, no solid pieces<br>ENTIRELY LIQUID      |

**Figure S2.** The Bristol Stool Form Scale. Reproduced by kind permission of Dr. KW Heaton, Reader in Medicine at the University of Bristol. ©2000 Produced by Norgine Pharmaceuticals Limited.

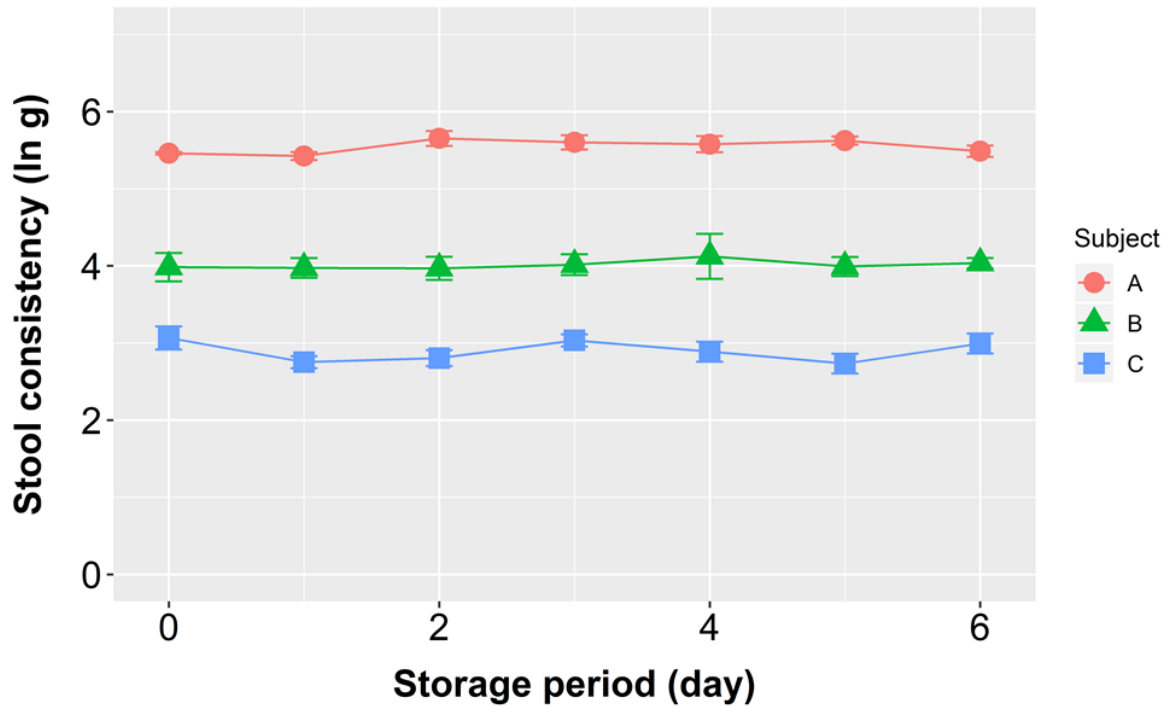

**Figure S3.** Change of stool consistency during refrigerator storage. Stool specimens were collected from 3 subjects (A, B, C) and their consistency (ln g) was repeatedly measured by texture analyzer just after defecation (day 0) and during refrigerator storage for 6 days.

**Table S1.** Agreement of stool type classification between raters and its relations with stool symptoms.

**A. Straining**

| Stool type classified by subjects | Stool type classified by expert (actual classification) |                |              |
|-----------------------------------|---------------------------------------------------------|----------------|--------------|
|                                   | Hard/lumpy                                              | Normal         | Loose/watery |
| Hard/lumpy                        | 33.3% (5/15)                                            | 36.8% (7/19)   | –            |
| Normal                            | 16.7% (1/6)                                             | 16.2% (28/173) | 0.0% (0/6)   |
| Loose/watery                      | –                                                       | 4.0% (1/25)    | 12.5% (1/8)  |

**B. Incompleteness**

| Stool type classified by subjects | Stool type classified by expert (actual classification) |                |              |
|-----------------------------------|---------------------------------------------------------|----------------|--------------|
|                                   | Hard/lumpy                                              | Normal         | Loose/watery |
| Hard/lumpy                        | 40.0% (6/15)                                            | 42.1% (8/19)   | –            |
| Normal                            | 66.7% (4/6)                                             | 31.8% (55/173) | 16.7% (1/6)  |
| Loose/watery                      | –                                                       | 20.0% (5/25)   | 25.0% (2/8)  |

Cells shading denotes classification by subjects that agree with classification by expert. Frequencies of sensation of (A) straining and (B) incompleteness during/after defecation are shown. –, not applicable.
